# Supplementary material
Source: PubMed Central journal article supplement (PMC3667658)
Supplement: NIHMS466346-supplement-1_si_001.pdf [file NIHMS466346-supplement-1_si_001.pdf]

**SUPPORTING INFORMATION for**  
**Influence of Active Site Location on Catalytic Activity in *de Novo*-  
Designed Zinc Metalloenzymes**

Melissa L. Zastrow and Vincent L. Pecoraro\*

Department of Chemistry, University of Michigan, Ann Arbor, Michigan 48109, United States

**Contents**

|                                                                                                                                                                                                                 |            |
|-----------------------------------------------------------------------------------------------------------------------------------------------------------------------------------------------------------------|------------|
| Folding as monitored by circular dichroism at pH 8.5                                                                                                                                                            | <b>S2</b>  |
| Comparison of unfolding through guanidine hydrochloride denaturation at pH 8.5                                                                                                                                  | <b>S3</b>  |
| Comparison of unfolding in the presence and absence of Zn(II) through guanidine hydrochloride denaturation                                                                                                      | <b>S4</b>  |
| Competitive Zincon binding titrations at pH 7.5 for (TRIL2WL23H) <sub>3</sub> , [Hg(II)] <sub>S</sub> (TRIL9HL23C) <sub>3</sub> <sup>-</sup> , and [Hg(II)] <sub>S</sub> (TRIL9CL19H) <sub>3</sub> <sup>-</sup> | <b>S5</b>  |
| Competitive Zincon binding titrations at pH 9.0 for [Hg(II)] <sub>S</sub> (TRIL9CL23H) <sub>3</sub> <sup>-</sup>                                                                                                | <b>S6</b>  |
| Competitive Zincon binding titrations at pH 9.0 for (TRIL2WL23H) <sub>3</sub> , [Hg(II)] <sub>S</sub> (TRIL9HL23C) <sub>3</sub> <sup>-</sup> , and [Hg(II)] <sub>S</sub> (TRIL9CL19H) <sub>3</sub> <sup>-</sup> | <b>S7</b>  |
| pH dependency of <i>k</i> <sub>cat</sub> and <i>K</i> <sub>M</sub> parameters for <i>p</i> NPA hydrolysis by Zn(II)-bound TRI peptides                                                                          | <b>S8</b>  |
| Inhibition of [Hg(II)] <sub>S</sub> [Zn(II)(H <sub>2</sub> O/OH <sup>-</sup> )] <sub>N</sub> (TRIL9CL23H) <sub>3</sub> <sup>n+</sup> -catalyzed <i>p</i> NPA hydrolysis by acetate at pH 8.5                    | <b>S9</b>  |
| Inhibition of [Zn(II)(H <sub>2</sub> O/OH <sup>-</sup> )] <sub>N</sub> [Hg(II)] <sub>S</sub> (TRIL9HL23C) <sub>3</sub> <sup>n+</sup> -catalyzed <i>p</i> NPA hydrolysis by acetate at pH 8.5                    | <b>S10</b> |
| Inhibition of [Hg(II)] <sub>S</sub> [Zn(II)(H <sub>2</sub> O/OH <sup>-</sup> )] <sub>N</sub> (TRIL9CL19H) <sub>3</sub> <sup>n+</sup> -catalyzed <i>p</i> NPA hydrolysis by acetate at pH 8.5                    | <b>S11</b> |

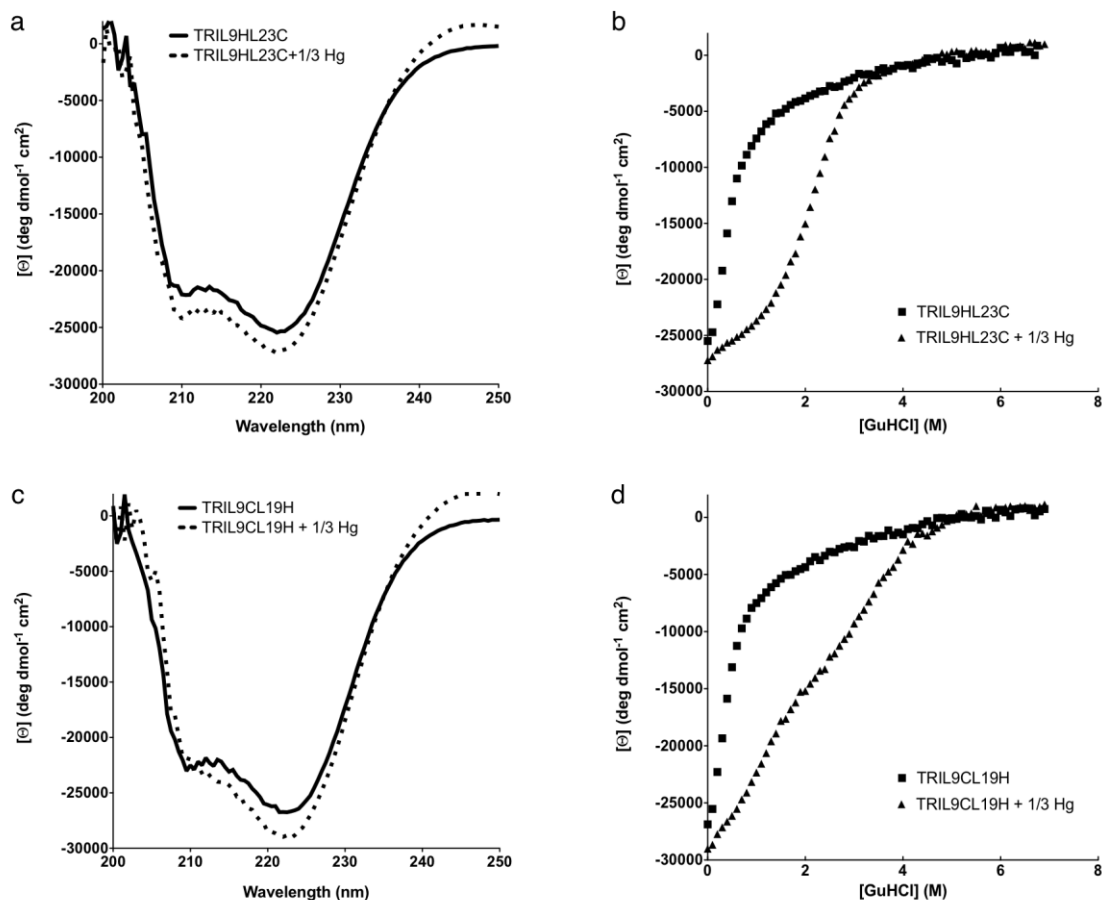

**Figure S1.** Folding of  $(\text{TRIL9HL23C})_3^{3-}$  (apo and +1/3 Hg(II)) and  $(\text{TRIL9CL19H})_3^{3-}$  (apo and +1/3 Hg(II)) as monitored by circular dichroism. a) CD spectra of  $(\text{TRIL9HL23C})_3^{3-}$  and  $(\text{TRIL9HL23C})_3^{3-} + 1/3 \text{ Hg(II)}$  at pH 8.5 and 25°C. The molar ellipticities  $[\Theta]$  at 222 nm are  $-25501$  and  $-27210^\circ \text{ dmol}^{-1} \text{ cm}^2$ , respectively. b) Guanidine hydrochloride denaturation titrations represented by the molar ellipticity values  $[\Theta]$  at 222 nm vs denaturant concentration for  $(\text{TRIL9HL23C})_3^{3-}$  and  $(\text{TRIL9HL23C})_3^{3-} + 1/3 \text{ Hg(II)}$ . c) CD spectra of  $(\text{TRIL9CL19H})_3^{3-}$  and  $(\text{TRIL9CL19H})_3^{3-} + 1/3 \text{ Hg(II)}$  at pH 8.5 and 25°C. The molar ellipticities  $[\Theta]$  at 222 nm are  $-26872$  and  $-29002^\circ \text{ dmol}^{-1} \text{ cm}^2$ , respectively. d) Guanidine hydrochloride denaturation titrations represented by the molar ellipticity values  $[\Theta]$  at 222 nm vs denaturant concentration for  $(\text{TRIL9CL19H})_3^{3-}$  and  $(\text{TRIL9CL19H})_3^{3-} + 1/3 \text{ Hg(II)}$ . As for our previously reported His-containing **TRI** peptides, we have not reported a quantitative determination of free energy values because the denaturation curves for these peptides do not level off at zero concentration of denaturant.<sup>1</sup>

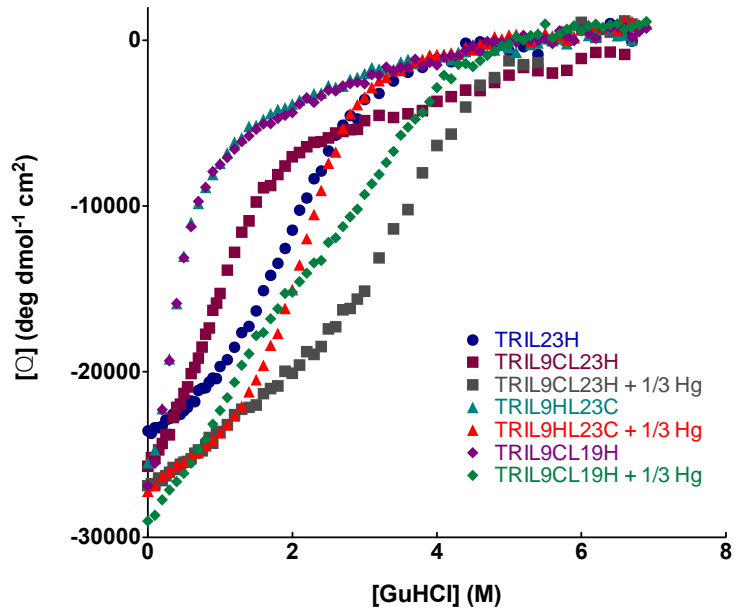

**Figure S2.** Comparison of the unfolding of  $(\text{TRIL9HL23C})_3^{3-}$  (apo and +1/3 Hg(II)) and  $(\text{TRIL9CL19H})_3^{3-}$  (apo and +1/3 Hg(II)) to  $(\text{TRIL23H})_3$  and  $(\text{TRIL9CL23H})_3^{3-}$  (apo and +1/3 Hg(II))<sup>1</sup>. Guanidine hydrochloride denaturation titrations at pH 8.5 represented by the molar ellipticity values  $[\Theta]$  at 222 nm vs denaturant concentration for  $(\text{TRIL23H})_3$ ,  $(\text{TRIL9CL23H})_3^{3-}$ ,  $(\text{TRIL9HL23C})_3^{3-}$ , and  $(\text{TRIL9CL19H})_3^{3-}$ . For each of the Cys-containing peptides, when comparing the apo versions and the Hg(II)-bound peptides, the midpoint is shifted to a higher denaturant concentration, demonstrating that the structural site confers stability on each of the constructs.

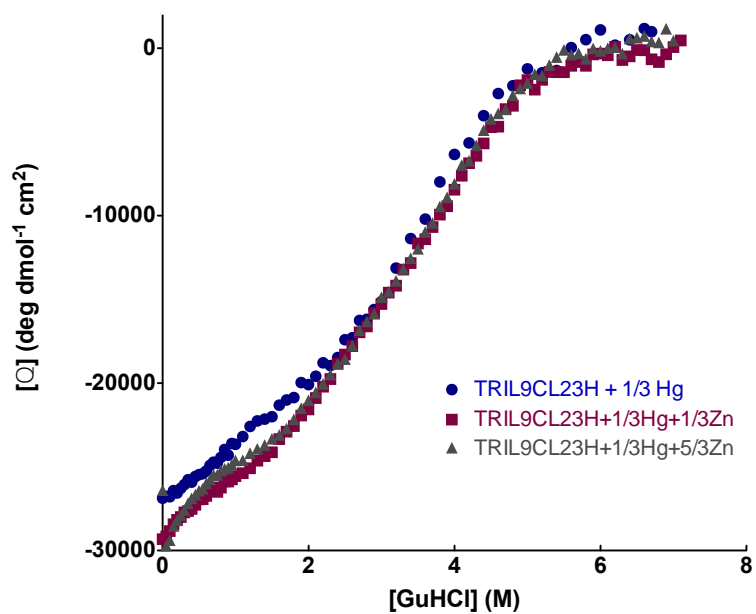

**Figure S3.** Comparison of the unfolding of  $(\text{TRIL9CL23H})_3^{3-} + 1/3 \text{ Hg(II)}$  in the presence of 0, 1, and 5 equivalents of Zn(II).<sup>1</sup> Guanidine hydrochloride denaturation titrations at pH 8.5 represented by the molar ellipticity values  $[\Theta]$  at 222 nm vs denaturant concentration for  $(\text{TRIL9CL19H})_3^{3-} + 1/3 \text{ Hg(II)}$  ( $\bullet$ ),  $(\text{TRIL9CL19H})_3^{3-} + 1/3 \text{ Hg(II)} + 1/3 \text{ Zn(II)}$  ( $\blacksquare$ ), and  $(\text{TRIL9CL19H})_3^{3-} + 1/3 \text{ Hg(II)} + 5/3 \text{ Zn(II)}$  ( $\blacktriangle$ ). There is no shift in the midpoint of unfolding in the presence of Zn(II).

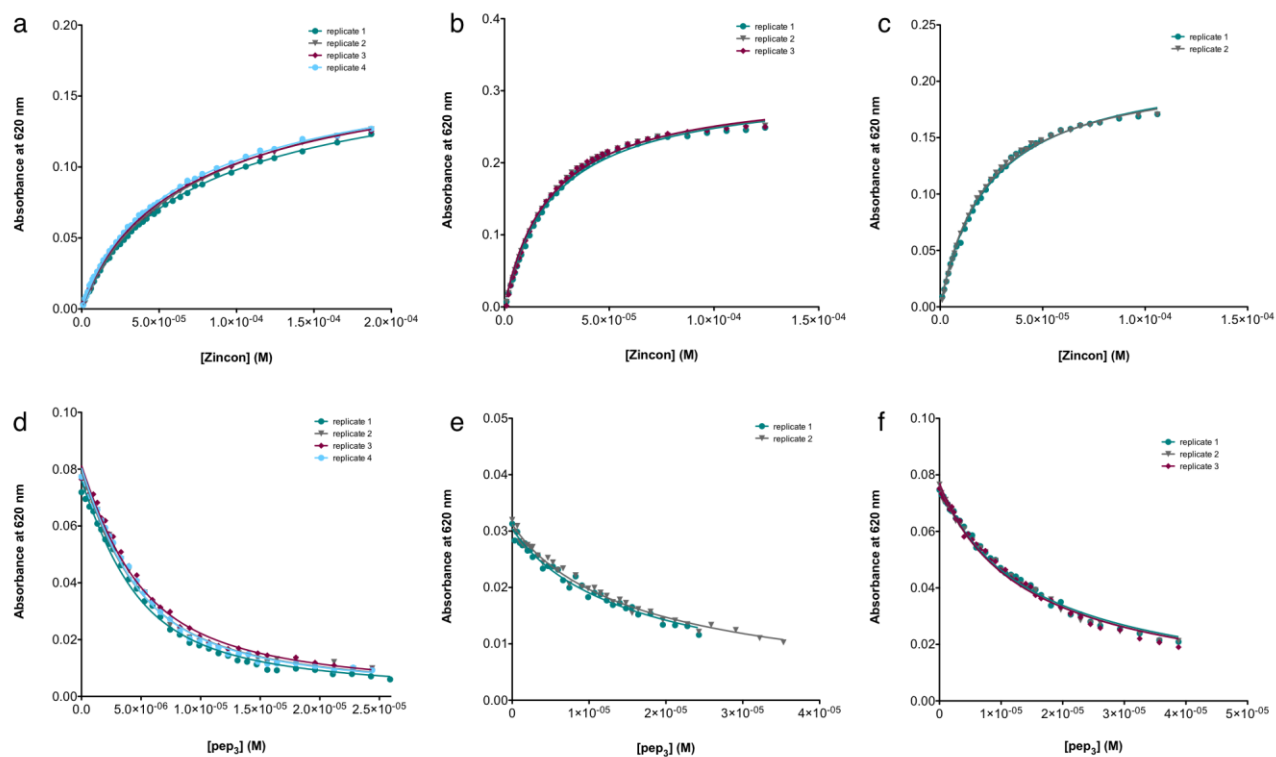

**Figure S4.** Competitive titrations against Zincon at pH 7.5 for  $(\text{TRIL2WL23H})_3$ ,  $[\text{Hg}(\text{II})]_S(\text{TRIL9HL23C})_3^-$ , and  $[\text{Hg}(\text{II})]_S(\text{TRIL9CL19H})_3^-$ . Plots of absorbances at 620 nm vs [Zincon] for the forward titrations of a)  $(\text{TRIL2WL23H})_3$ , b)  $[\text{Hg}(\text{II})]_S(\text{TRIL9HL23C})_3^-$ , and c)  $[\text{Hg}(\text{II})]_S(\text{TRIL9CL19H})_3^-$  and vs [pep<sub>3</sub>] for the reverse titrations of d)  $(\text{TRIL2WL23H})_3$ , e)  $[\text{Hg}(\text{II})]_S(\text{TRIL9HL23C})_3^-$ , and f)  $[\text{Hg}(\text{II})]_S(\text{TRIL9CL19H})_3^-$ .

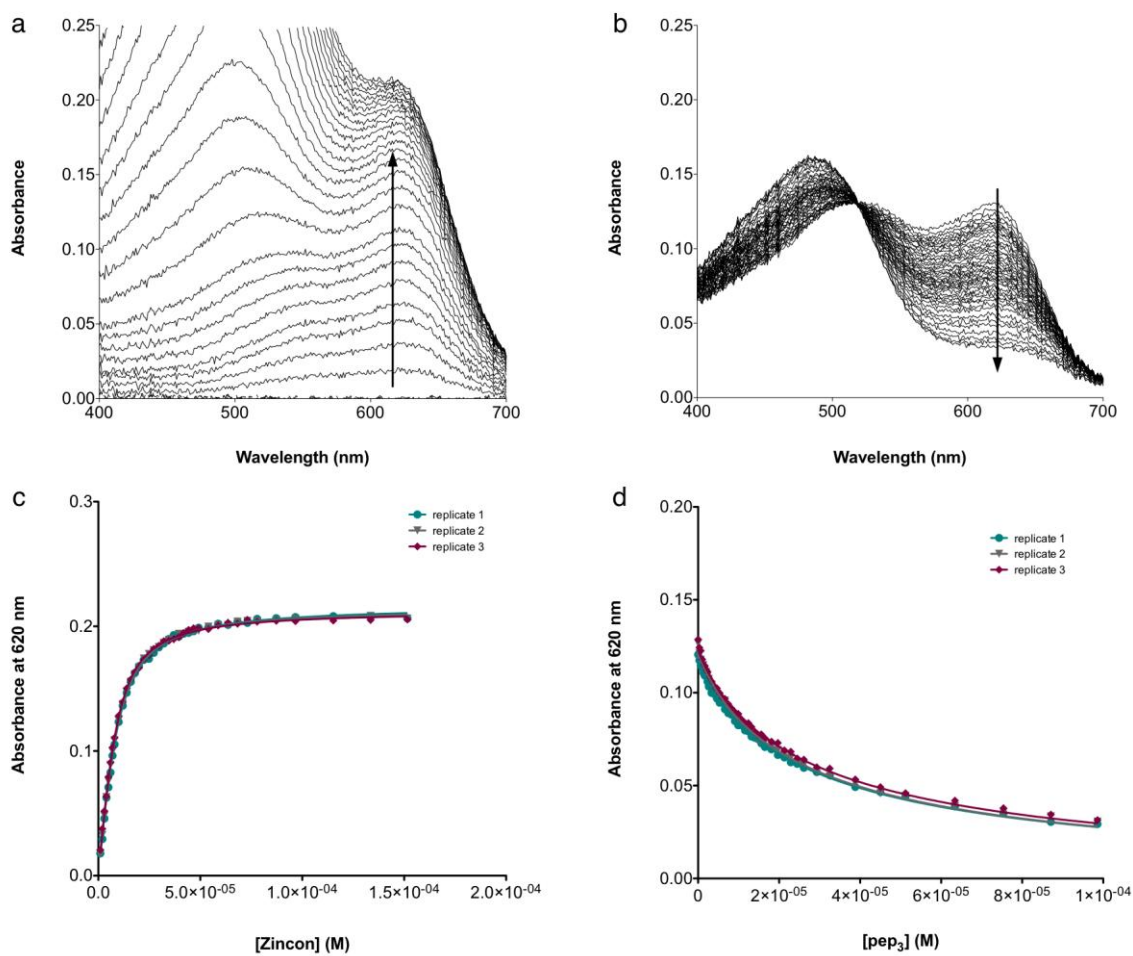

**Figure S5.** Competitive Zincon binding titrations at pH 9.0 for  $[\text{Hg}(\text{II})]_5(\text{TRIL9CL23H})_3^-$  in the forward ( $\text{Zn}(\text{II})\text{pep}_3 + \text{Zincon}$ ) and reverse ( $\text{Zn}(\text{II})\text{Zi} + \text{pep}_3$ ) direction. a) Representative UV-visible spectra for the titration in the forward direction and b) in the reverse direction. c) Plot of absorbance at 620 nm as a function of increasing  $[\text{Zincon}]$  for the forward titration and d) as a function of increasing  $[\text{pep}_3]$  for the reverse titration.

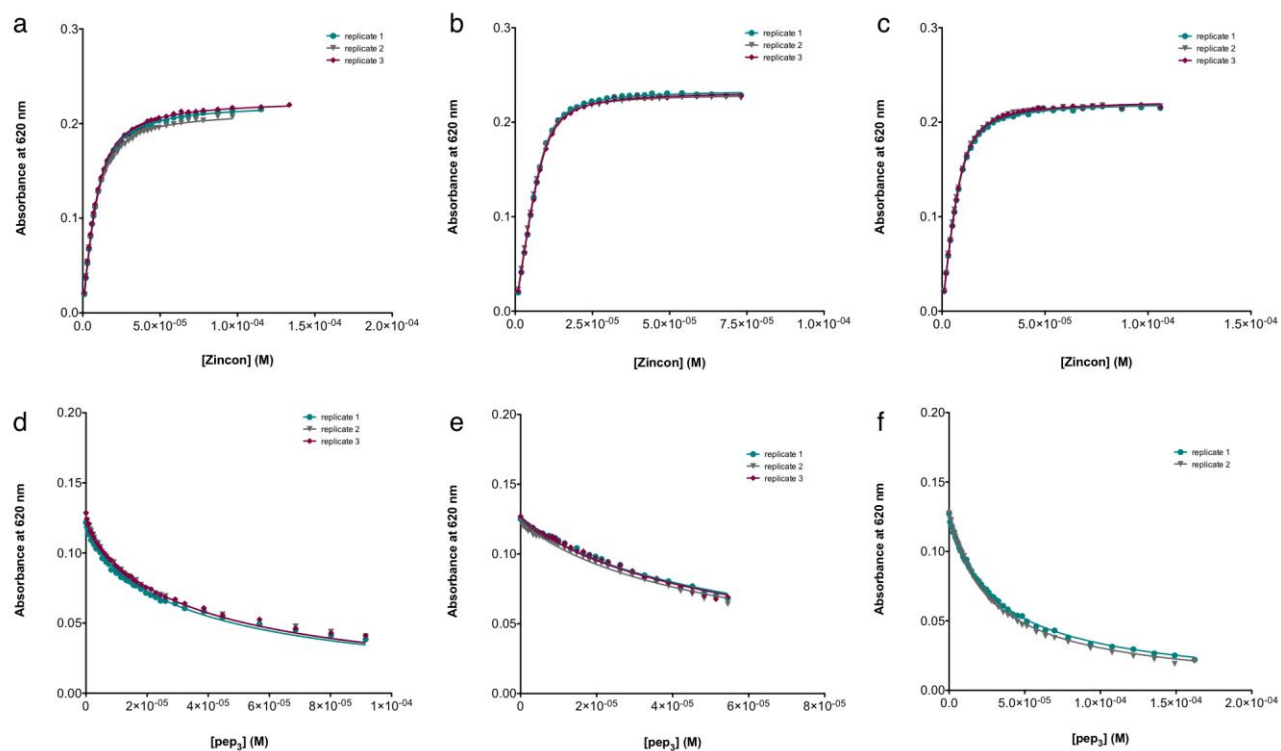

**Figure S6.** Competitive titrations against Zincon at pH 9.0 for  $(\text{TRIL2WL23H})_3$ ,  $[\text{Hg}(\text{II})]_S(\text{TRIL9HL23C})_3^-$ , and  $[\text{Hg}(\text{II})]_S(\text{TRIL9CL19H})_3^-$ . Plots of absorbances at 620 nm vs [Zincon] for the forward titrations of a)  $(\text{TRIL2WL23H})_3$ , b)  $[\text{Hg}(\text{II})]_S(\text{TRIL9HL23C})_3^-$ , and c)  $[\text{Hg}(\text{II})]_S(\text{TRIL9CL19H})_3^-$  and vs  $[\text{pep}_3]$  for the reverse titrations of d)  $(\text{TRIL2WL23H})_3$ , e)  $[\text{Hg}(\text{II})]_S(\text{TRIL9HL23C})_3^-$ , and f)  $[\text{Hg}(\text{II})]_S(\text{TRIL9CL19H})_3^-$ .

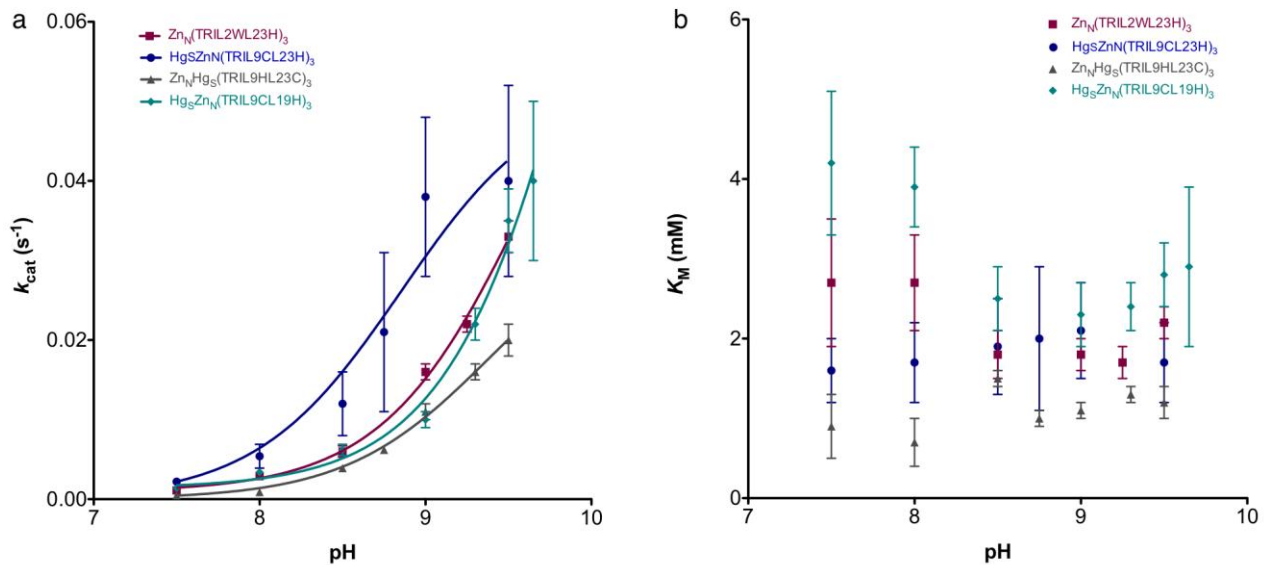

**Figure S7.** pH dependency of a)  $k_{\text{cat}}$  and b)  $K_M$  parameters for *p*NPA hydrolysis by Zn(II)His<sub>3</sub>O sites in the TRI peptides. Results are shown for  $[\text{Zn}(\text{II})(\text{H}_2\text{O}/\text{OH}^-)]_N(\text{TRIL2WL23H})_3^{n+}$ ,  $[\text{Hg}(\text{II})]_S[\text{Zn}(\text{II})(\text{H}_2\text{O}/\text{OH}^-)]_N(\text{TRIL9CL23H})_3^{n+}$ ,  $[\text{Zn}(\text{II})(\text{H}_2\text{O}/\text{OH}^-)]_N[\text{Hg}(\text{II})]_S(\text{TRIL9HL23C})_3^{n+}$ , and  $[\text{Hg}(\text{II})]_S[\text{Zn}(\text{II})(\text{H}_2\text{O}/\text{OH}^-)]_N(\text{TRIL9CL19H})_3^{n+}$ . Error bars result from fitting all individual initial rates measured (three per concentration of substrate, without averaging) to the Michaelis-Menten equation in Prism 5 (GraphPad Software).



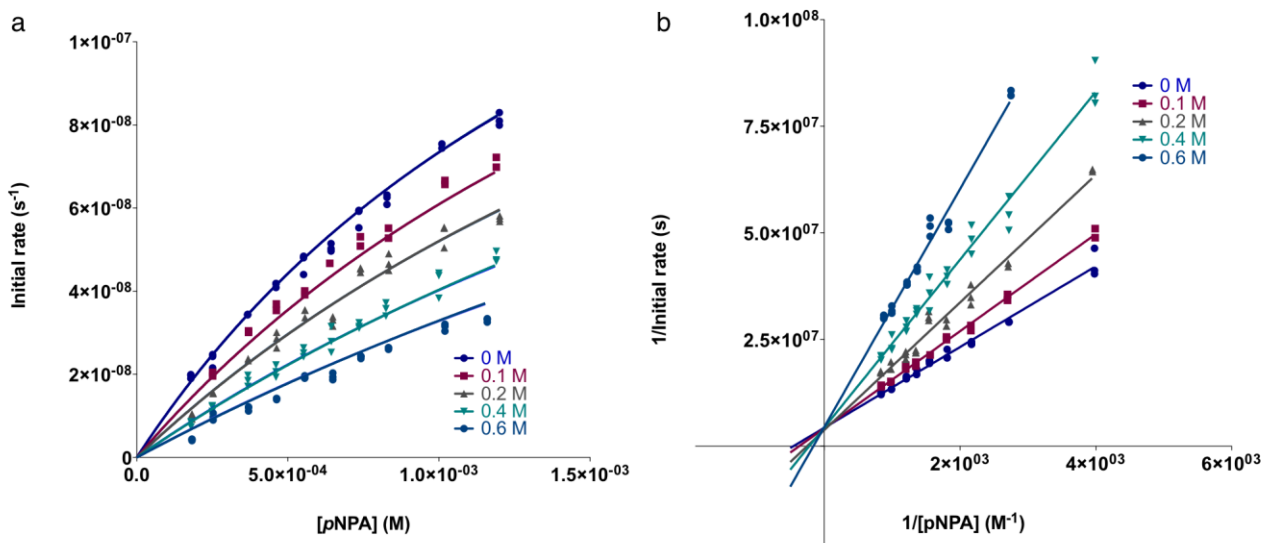

**Figure S8.** Inhibition of 20  $\mu\text{M}$   $[\text{Hg}(\text{II})]_5[\text{Zn}(\text{II})(\text{H}_2\text{O}/\text{OH}^-)]_N(\text{TRIL9CL23H})_3^{n+}$ -catalyzed *p*NPA hydrolysis by acetate at pH 8.5. a) Initial rates as a function of substrate concentration in the presence of 0, 0.1, 0.2, 0.4, and 0.6 M potassium acetate fitted to a competitive inhibition model in Prism 5 (GraphPad Software). The global data yields the reported  $K_I$  and corresponding error. Data shown consists of each individual measured initial rate and does not represent averages. Fitting the same data to a mixed inhibition model yielded  $\alpha \approx 14$  supporting the assignment of a competitive inhibition model.<sup>2</sup> b) Lineweaver-Burke (double-reciprocal) plots corresponding to the data in a). Visual inspection of the intersection of linear fits to each dataset (at the y-axis) also supports a competitive inhibition model.

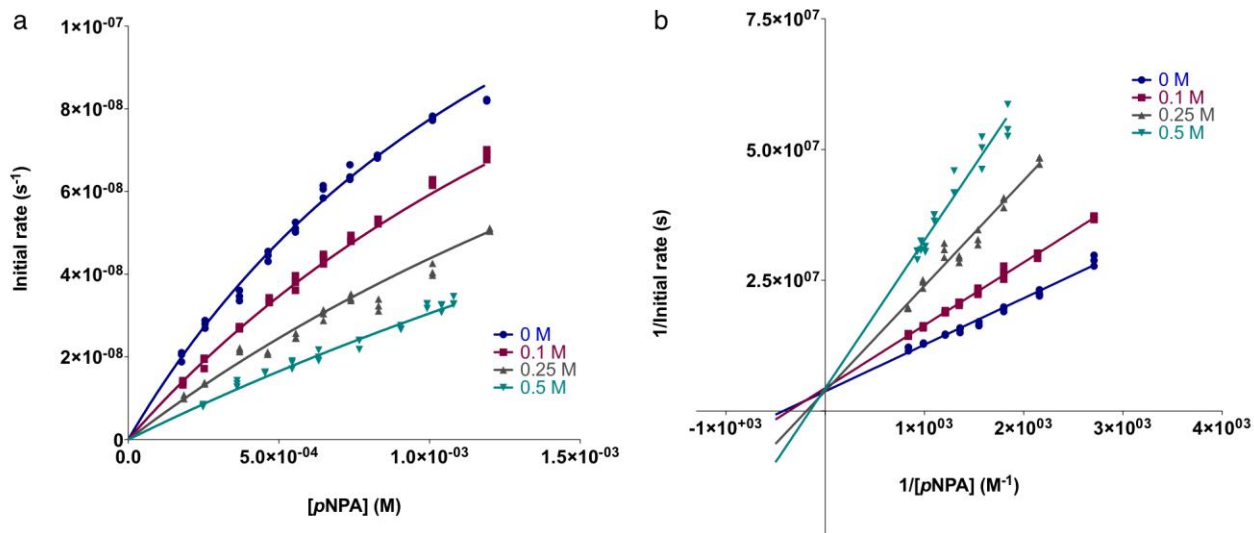

**Figure S9.** Inhibition of 50  $\mu\text{M}$   $[\text{Zn}(\text{II})(\text{H}_2\text{O}/\text{OH}^-)]_N[\text{Hg}(\text{II})]_S(\text{TRIL9HL23C})_3^{n+}$ -catalyzed *p*NPA hydrolysis by acetate at pH 8.5. a) Initial rates as a function of substrate concentration in the presence of 0, 0.1, 0.25, and 0.5 M potassium acetate fitted to a competitive inhibition model in Prism 5 (GraphPad Software). The global data yields the reported  $K_1$  and corresponding error. Data shown consists of each measured individual initial rate and does not represent averages. Fitting the same data to a mixed inhibition model yielded  $\alpha \approx 3 \times 10^{13}$  supporting the assignment of a competitive inhibition model.<sup>2</sup> b) Lineweaver-Burke (double-reciprocal) plots corresponding to the data in a). Visual inspection of the intersection of linear fits to each dataset (at the y-axis) also supports a competitive inhibition model.

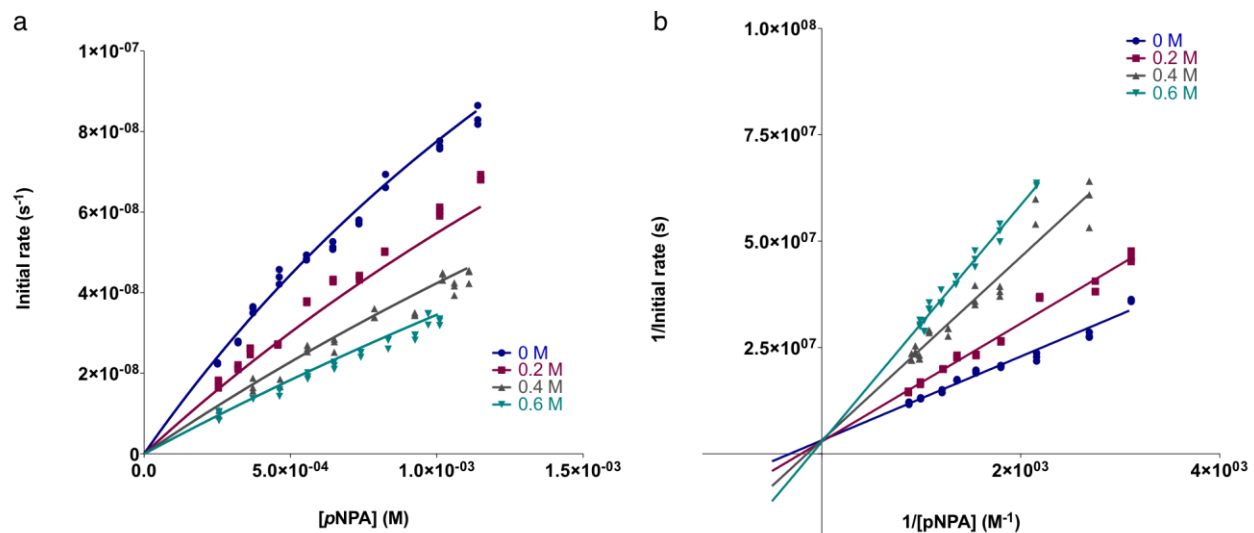

**Figure S10.** Inhibition of 50  $\mu\text{M}$   $[\text{Hg}(\text{II})]_5[\text{Zn}(\text{II})(\text{H}_2\text{O}/\text{OH}^-)]_N(\text{TRIL9CL19H})_3^{n+}$ -catalyzed *p*NPA hydrolysis by acetate at pH 8.5. a) Initial rates as a function of substrate concentration in the presence of 0, 0.2, 0.4, and 0.6 M potassium acetate fitted to a competitive inhibition model in Prism 5 (GraphPad Software). The global data yields the reported  $K_I$  and corresponding error. Data shown consists of each measured individual initial rate and does not represent averages. Fitting the same data to a mixed inhibition model yielded  $\alpha \approx 31$  supporting the assignment of a competitive inhibition model.<sup>2</sup> b) Lineweaver-Burke (double-reciprocal) plots corresponding to the data in a). Visual inspection of the intersection of linear fits to each dataset (at the y-axis) also supports a competitive inhibition model.

## REFERENCES

- (1) Zastrow, M. L.; Peacock, A. F. A.; Stuckey, J. A.; Pecoraro, V. L. *Nat. Chem.* **2012**, *4*, 118–23.
- (2) Marangoni, A. G. *Enzyme Kinetics; reversible enzyme inhibition*; John Wiley & Sons, Inc.: Hoboken, NJ, USA, 2002; pp 61-69.
